# Supplementary material for: Predicting Facial Attractiveness from Colour Cues: A New Analytic Framework
Source: MDPI journal article supplement (doi:10.3390/s24020391), 2024-01-09
Supplement: s1 [file s1]

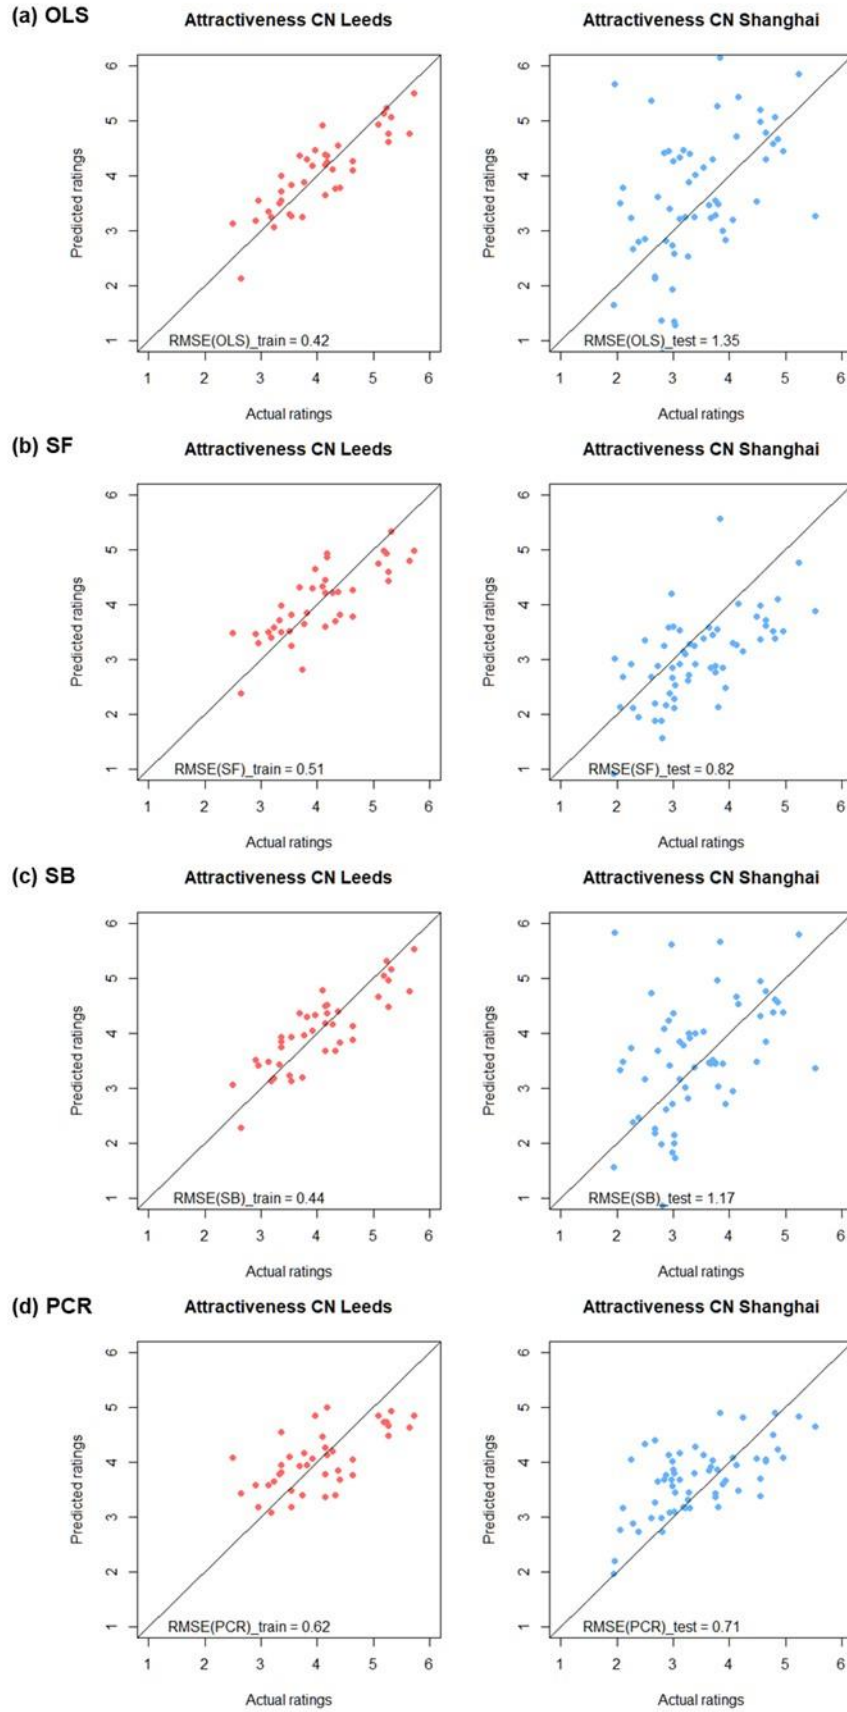

Figure S1: Model performance of the (a) OLS, (b) SF, (c) SB, (d) PCR in predicting facial attractiveness for the training data (left column) and the testing data (right column).

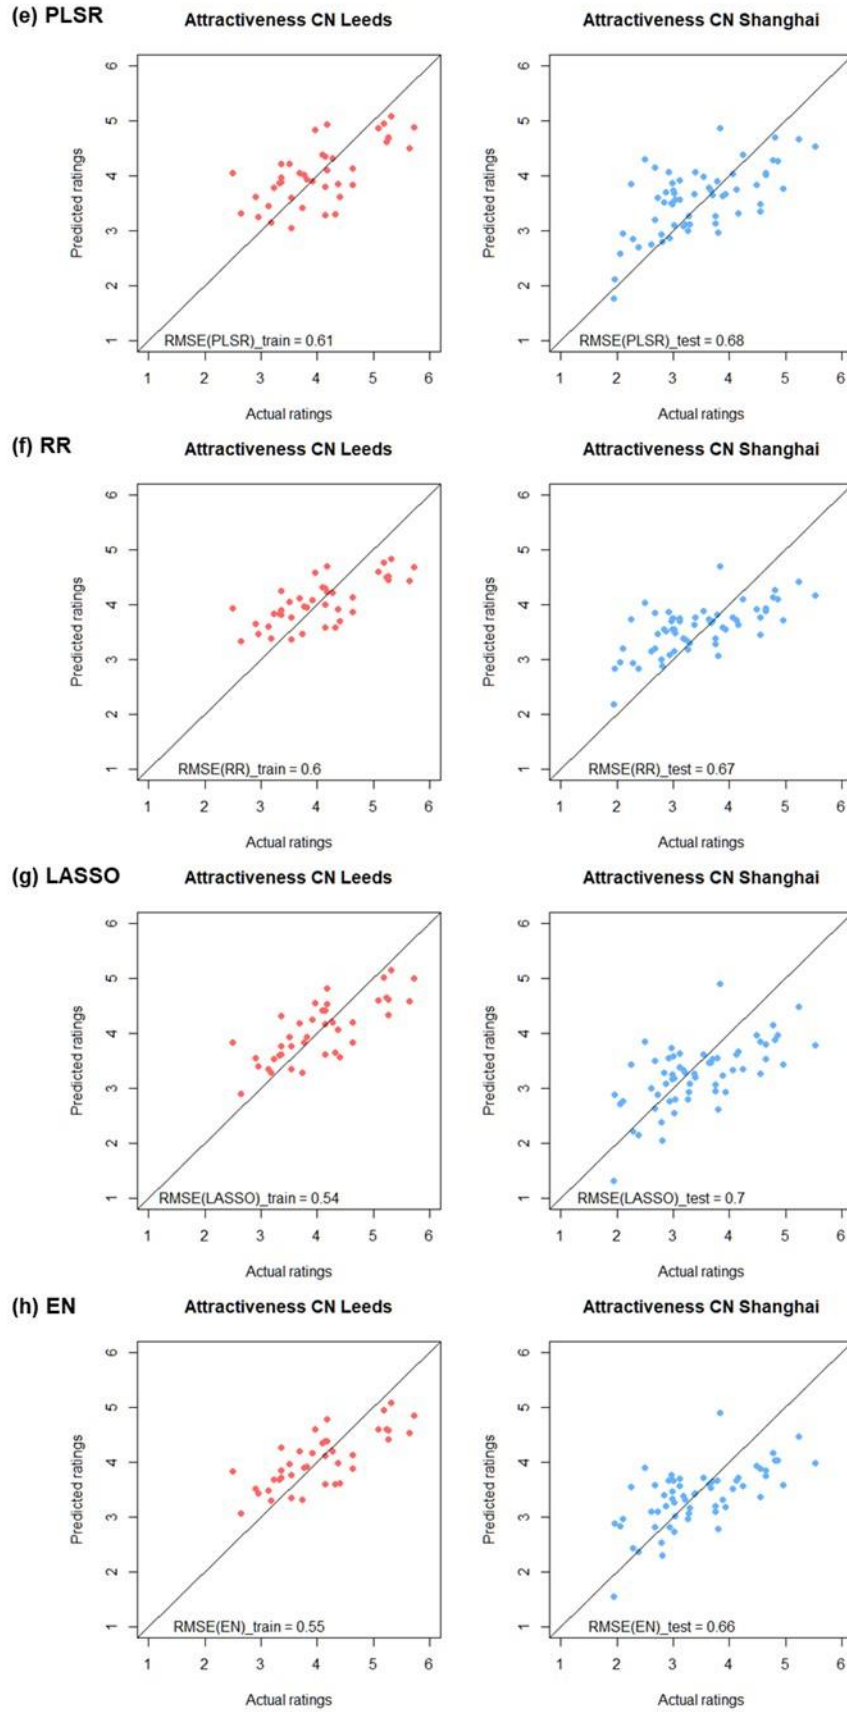

Figure S2: Model performance of the (e) PLSR, (f) RR, (g) LASSO, (h) EN in predicting facial attractiveness for the training data (left column) and the testing data (right column).
